# Supplementary material
Source: PubMed Central journal article supplement (PMC3137639)

# Supplementary Fig.1

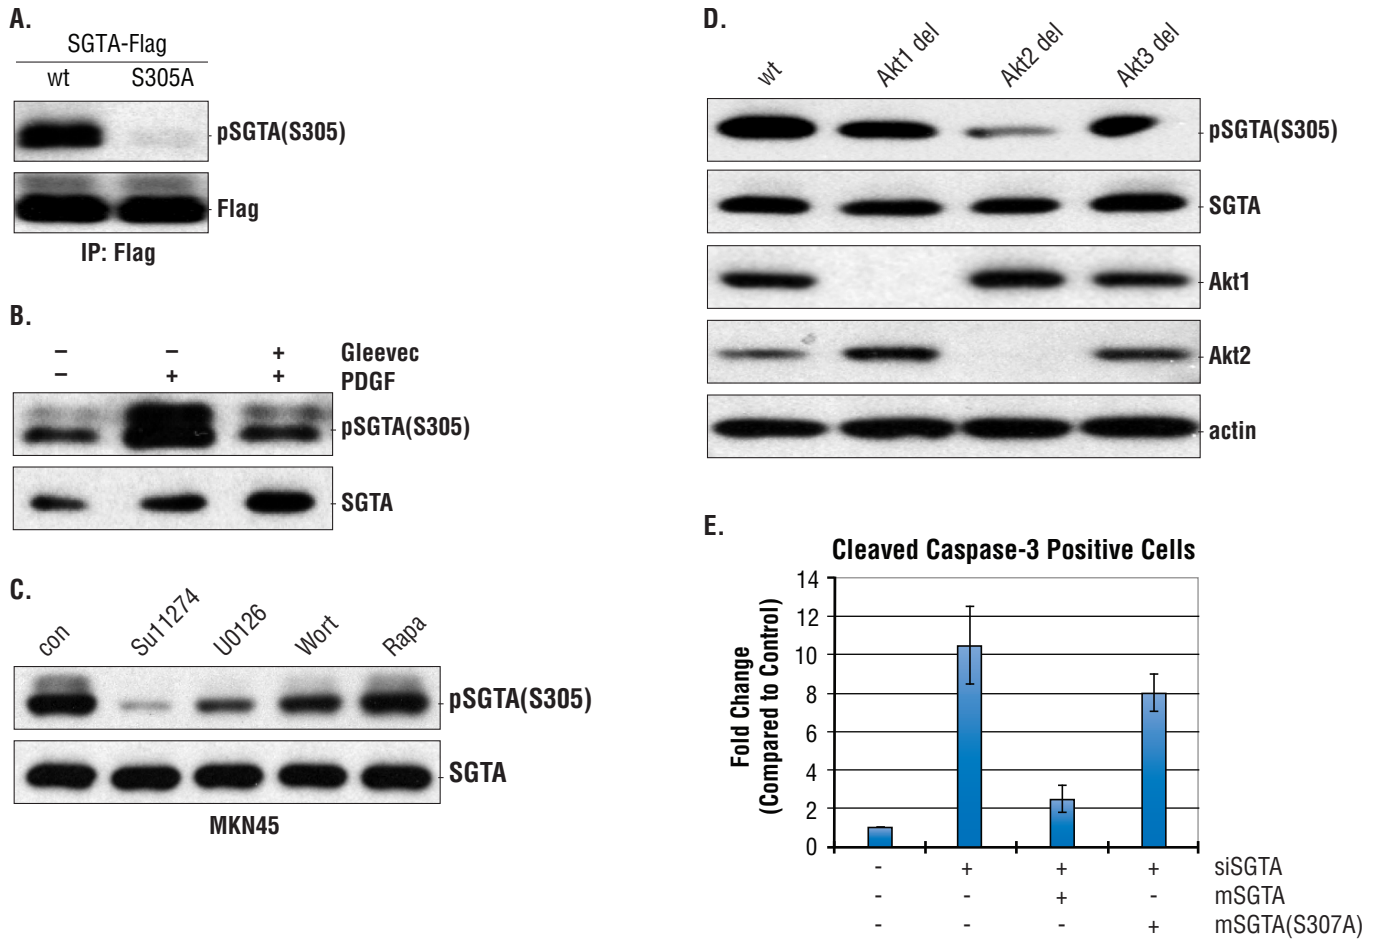

Supplement: NIHMS306822-supplement-Supplementary_Figure_1.pdf [file NIHMS306822-supplement-Supplementary_Figure_1.pdf]

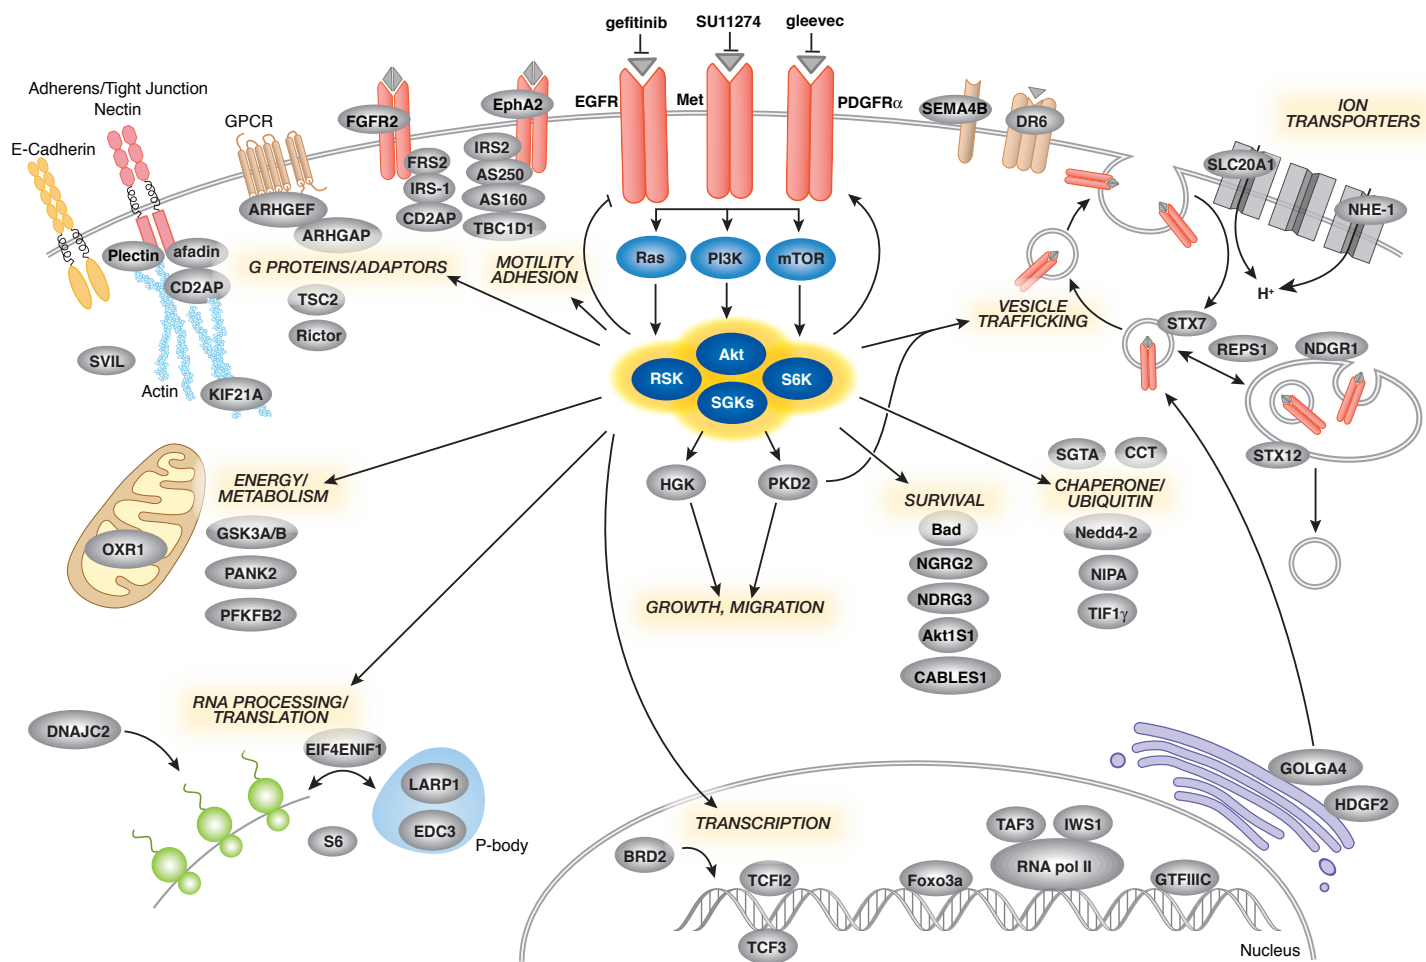

Supplement: NIHMS306822-supplement-Supplementary_Figure_2.pdf [file NIHMS306822-supplement-Supplementary_Figure_2.pdf]
